# Supplementary material for: Emergent gambling advertising; a rapid review of marketing content, delivery and structural features
Source: Springer Nature journal article supplement (doi:10.1186/s12889-021-10805-w), 2021-04-13
Supplement: MOESM1 [file 19061628]

**Search strategy: Databases, filters and search terms – conducted 02/06/20**

**PsychInfo (via proquest) – advanced search**

Filters:

From 01 January 2015 to 06 June 2020

Scholarly Journals

Empirical Study

Language: English

Terms: ((gambl\* OR betting OR casino\* OR sports\*) AND (market\* OR advert\* OR promot\*) AND (content OR strateg\*))

**418 results**

**Web of Science (Science Citation Index Expanded & Social Sciences Citation Index) – advanced search**

Filters:

From 2015-2020

Document type: article

Language: English

Terms: ((gambl\* OR betting OR casino\* OR sports\*) AND (market\* OR advert\* OR promot\*) AND (content OR strateg\*))

**935 results**

**Google Scholar – free searching**

Filters:

From 2015-2020

Patents and citations excluded

**16 results**
